# Supplementary material for: Brain-Derived Neurotrophic Factor as a Potential Mediator of the Beneficial Effects of Myo-Inositol Supplementation during Suckling in the Offspring of Gestational-Calorie-Restricted Rats
Source: MDPI journal article supplement (doi:10.3390/nu16070980), 2024-03-27
Supplement: s1 [file s1]

Figure S1. Expression levels of *Insr* and *Lepr* in hypothalamus at 7 months.

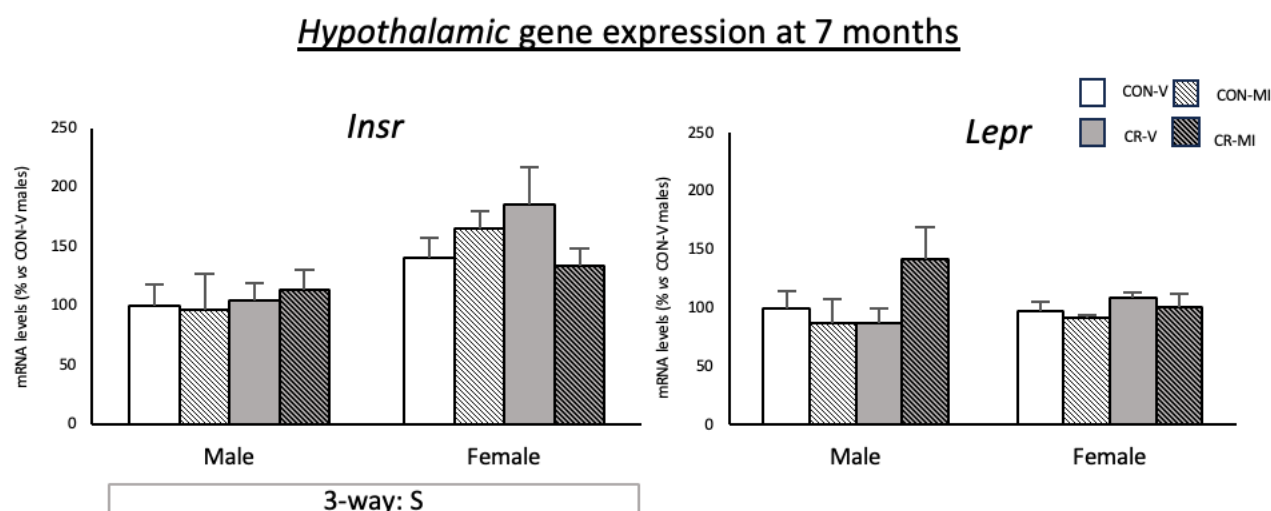

Expression level of *Insr* and *Lepr* in hypothalamus of the offspring of controls (CON) and calorie-restricted dams during gestation (CR) treated with vehicle (V) or myo-inositol (MI) during the suckling period, at the age of 7 months. mRNA levels are expressed as a percentage of the value of CON-V male animals. Data are mean  $\pm$  SEM. Statistics: Three-way ANOVA was performed to analyze the effects of sex (S), gestational calorie restriction (R) and/or myo-inositol treatment during lactation (M). In each sex, two-way ANOVA was performed to analyze the effects of calorie restriction and/or myo-inositol supplementation. Single comparisons between groups were performed by Student's t-test: \*, different from their respective vehicle supplemented group; #, different from their respective control group.

*Figure S2.* Gene expression levels of *Ucp1* in brown adipose tissue at 25 days-old and 7 months.

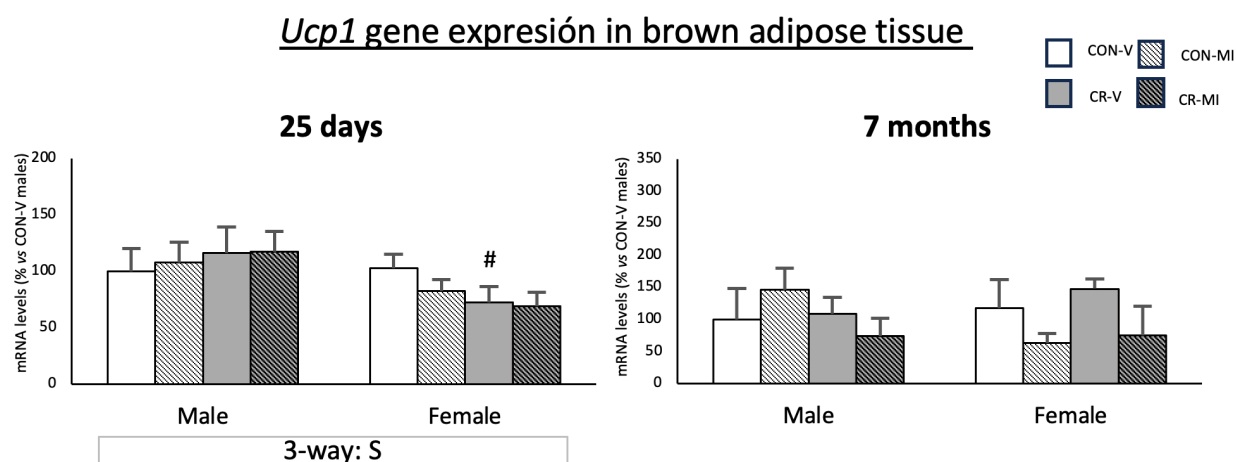

Expression level of *Ucp1* in brown adipose tissue of the offspring of controls (CON) and calorie-restricted dams during gestation (CR) treated with vehicle (V) or myo-inositol (MI) during the suckling period, at the age of 25 days and 7 months. mRNA levels are expressed as a percentage of the value of CON-V male animals. Data are mean  $\pm$  SEM. Statistics: Three-way ANOVA was performed to analyze the effects of sex (S), gestational calorie restriction (R) and/or myo-inositol treatment during lactation (M). In each sex, two-way ANOVA was performed to analyze the effects of calorie restriction and/or myo-inositol supplementation. Single comparisons between groups were performed by Student's t-test: \*, different from their respective vehicle supplemented group; #, different from their respective control group.

*Figure S3. Bands of each protein of interest analysed by Western Blot*

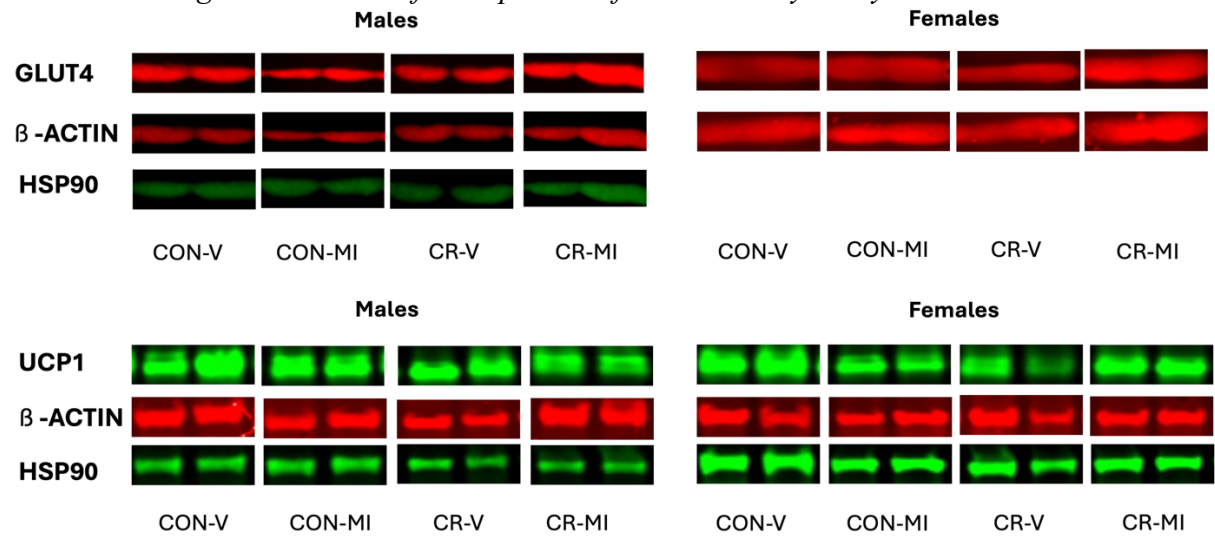

Representative bands of each protein of interest (GLUT4 and UCP1) and reference proteins ( $\beta$ -Actin and/or HSP90) for each animal group are shown. They have been cut from the same membrane and grouped together in the image. Abbreviations: control (CON), gestational calorie-restricted (CR), vehicle (V), myo-inositol (MI).
